# Supplementary material for: Platelet-rich plasma enhances the repair capacity of muscle-derived mesenchymal stem cells to large humeral bone defect in rabbits
Source: PubMed Central journal article supplement (PMC7174361; doi:10.1038/s41598-020-63496-5), 2020-04-21
Supplement: 41598_2020_63496_MOESM1_ESM.pdf [file 41598_2020_63496_MOESM1_ESM.pdf]

## Supplementary Information

### Title Page

Platelet-rich plasma enhances the repair capacity of muscle-derived mesenchymal stem cells to large humeral bone defect in rabbits

Nuo Yin<sup>#</sup>, Yifei Wang<sup>#</sup>, Liang Ding, Junjie Yuan, Li Du, Zhongsheng Zhu, Mingmang Pan, Feng Xue<sup>\*</sup>, Haijun Xiao<sup>\*</sup>

*Department of orthopedics, Shanghai Fengxian District Central Hospital, Shanghai, China, 201499.*

<sup>#</sup>These authors contributed equally: Nuo Yin and Yifei Wang.

<sup>\*</sup>Corresponding authors:

Dr. Feng Xue

Affiliation: Department of orthopedics, Shanghai Fengxian District Central Hospital

Address: No. 6600 Nanfeng Highway, Fengxian District, Shanghai

E-mail: [xuemd@yahoo.com](mailto:xuemd@yahoo.com); Tel: 57424074

Dr. Haijun Xiao

Affiliation: Department of orthopedics, Shanghai Fengxian District Central Hospital

Address: No. 6600 Nanfeng Highway, Fengxian District, Shanghai

E-mail: [xiaohaijun89@126.com](mailto:xiaohaijun89@126.com); Tel: 57424074

|                 | Items                                    | Socre |
|-----------------|------------------------------------------|-------|
|                 | No connections                           | 0     |
|                 | Fibrous connections                      | 1     |
| Bone connection | Connections of bone and bone-like tissue | 2     |
|                 | Connections of bones                     | 3     |
|                 | Complete bone regeneration               | 4     |
|                 | No activity of osteocytes                | 0     |
|                 | Early aggregation of new bone            | 1     |
| Cancellous bone | Activity of new bone aggregation         | 2     |
|                 | Cancellous bone is remoulding            | 3     |
|                 | Cancellous bone remoulds completely      | 4     |
|                 | No growth of cortical bone               | 0     |
|                 | Early growth of cortical bone            | 1     |
| Cortical bone   | Cortical bone is remoulding              | 2     |
|                 | Most Cortical bone completes remoulding  | 3     |
|                 | Cortical bone remoulds completely        | 4     |

**Supplementary Table 1.** Lane-Sandhu histological evaluation scale

### For gels/blots quality check

1. Full length picture of original gels/blots (low-contrast)

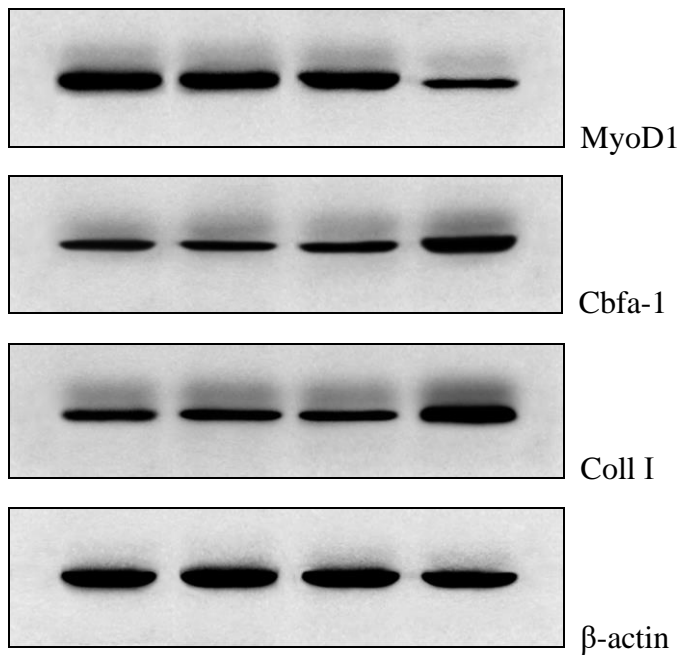

2. Combination and cropping

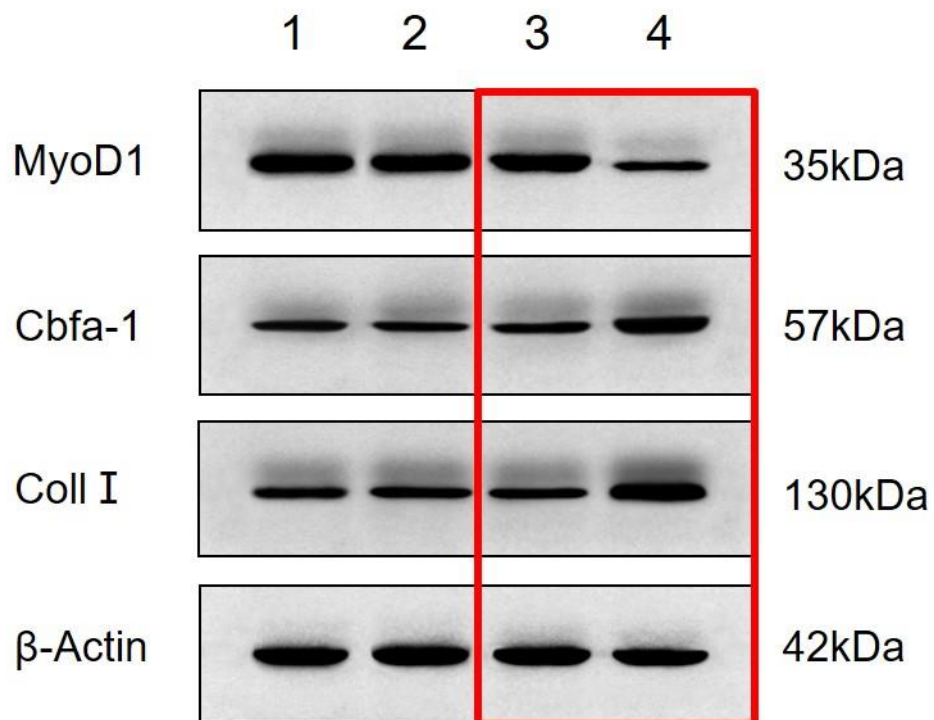

Group information:

1. M-MSCs treated with 1% FBS (Hyclone)
2. M-MSCs treated with 10% FBS (Gibco)
3. M-MSCs treated with 10% FBS (Hyclone)
4. M-MSCs treated with PRP.

Group 1. 2. 3 were set to explore the effects of different concentration of FBS or FBS

from different brand on the differentiation of M-MSCs. Due to no significant differences were observed, this part was deleted. The red border stands for the cutline of cropping.
